# Supplementary material for: Identification and characterization of miRNAs and targets in flax (Linum usitatissimum) under saline, alkaline, and saline-alkaline stresses
Source: PubMed Central journal article supplement (PMC4884397; doi:10.1186/s12870-016-0808-2), 2016-05-27
Supplement: 12870_2016_808_MOESM7_ESM.pdf [file 12870_2016_808_MOESM7_ESM.pdf]

A

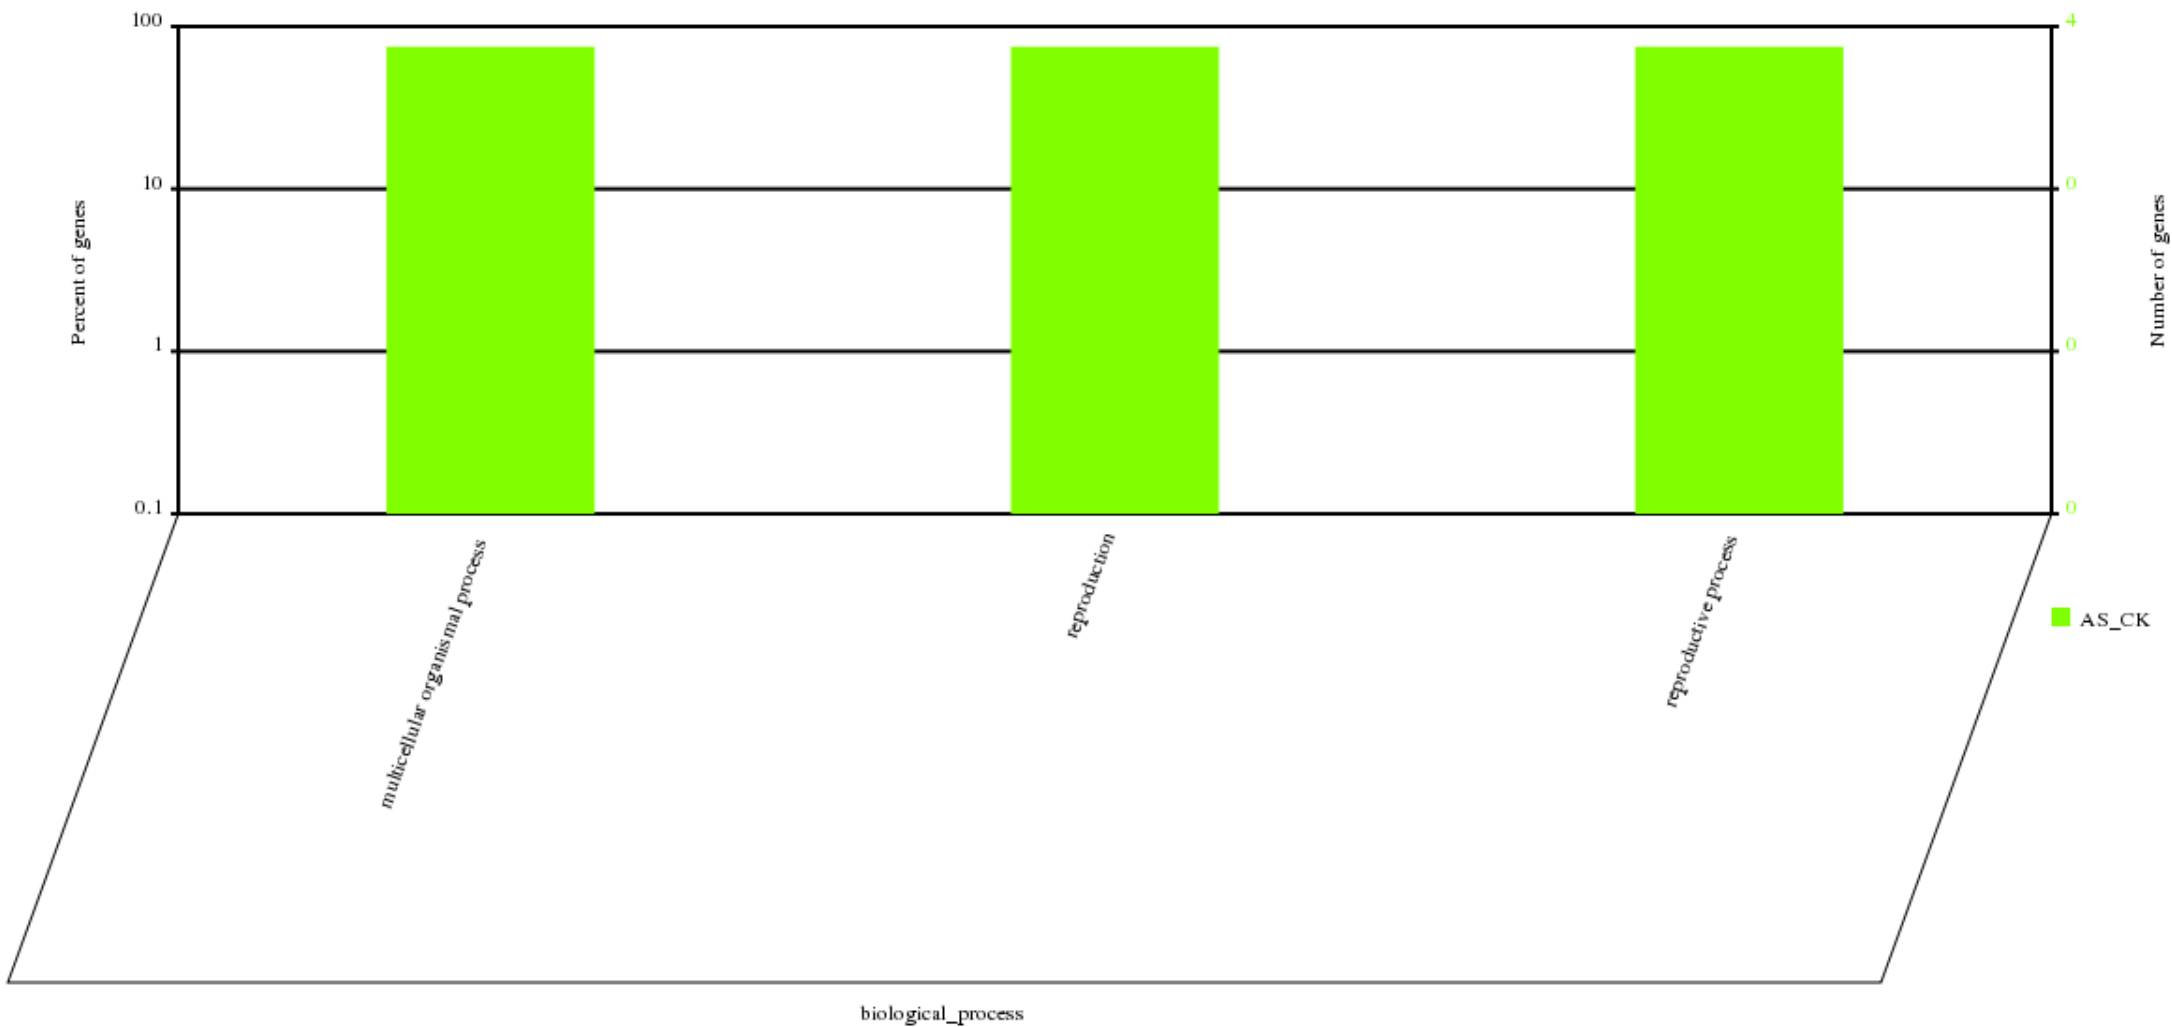

B

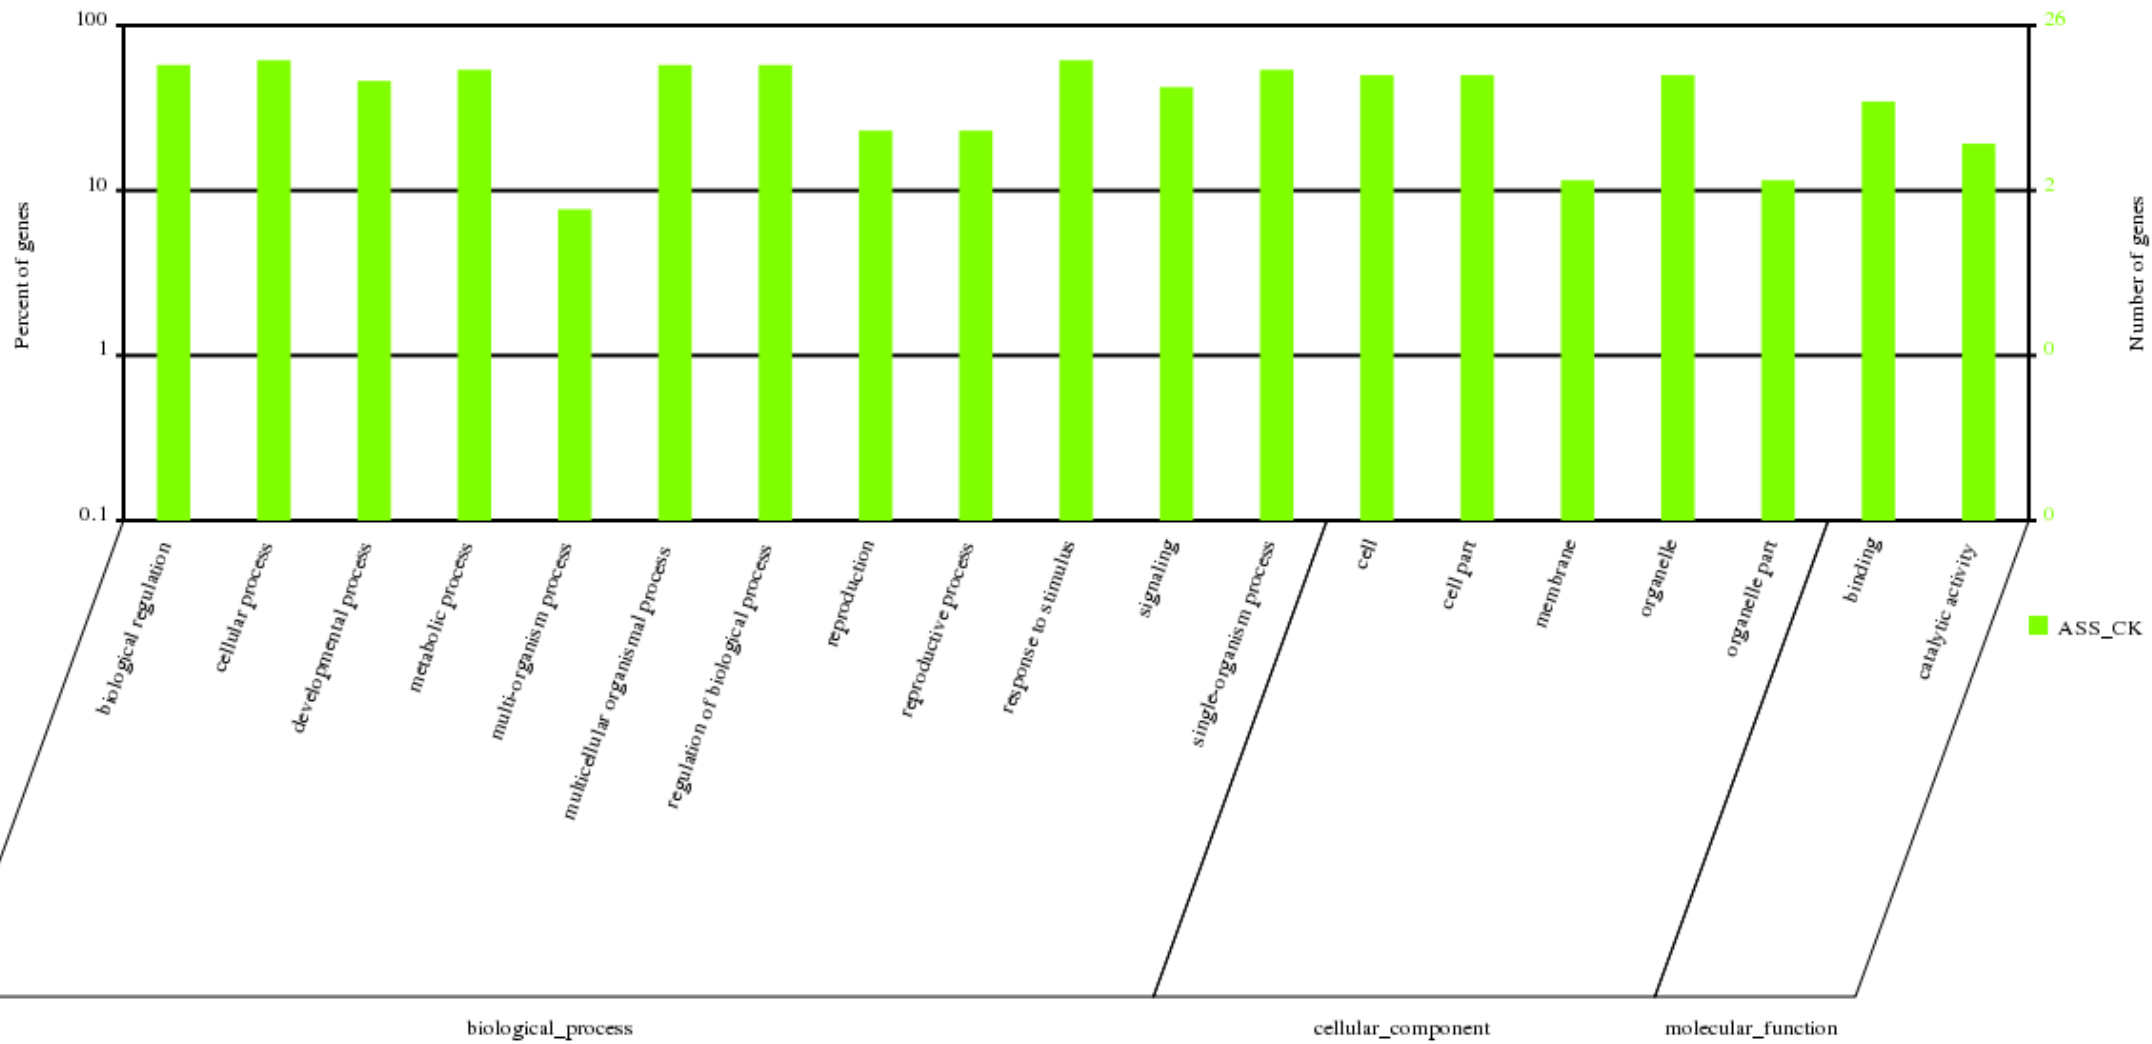

C

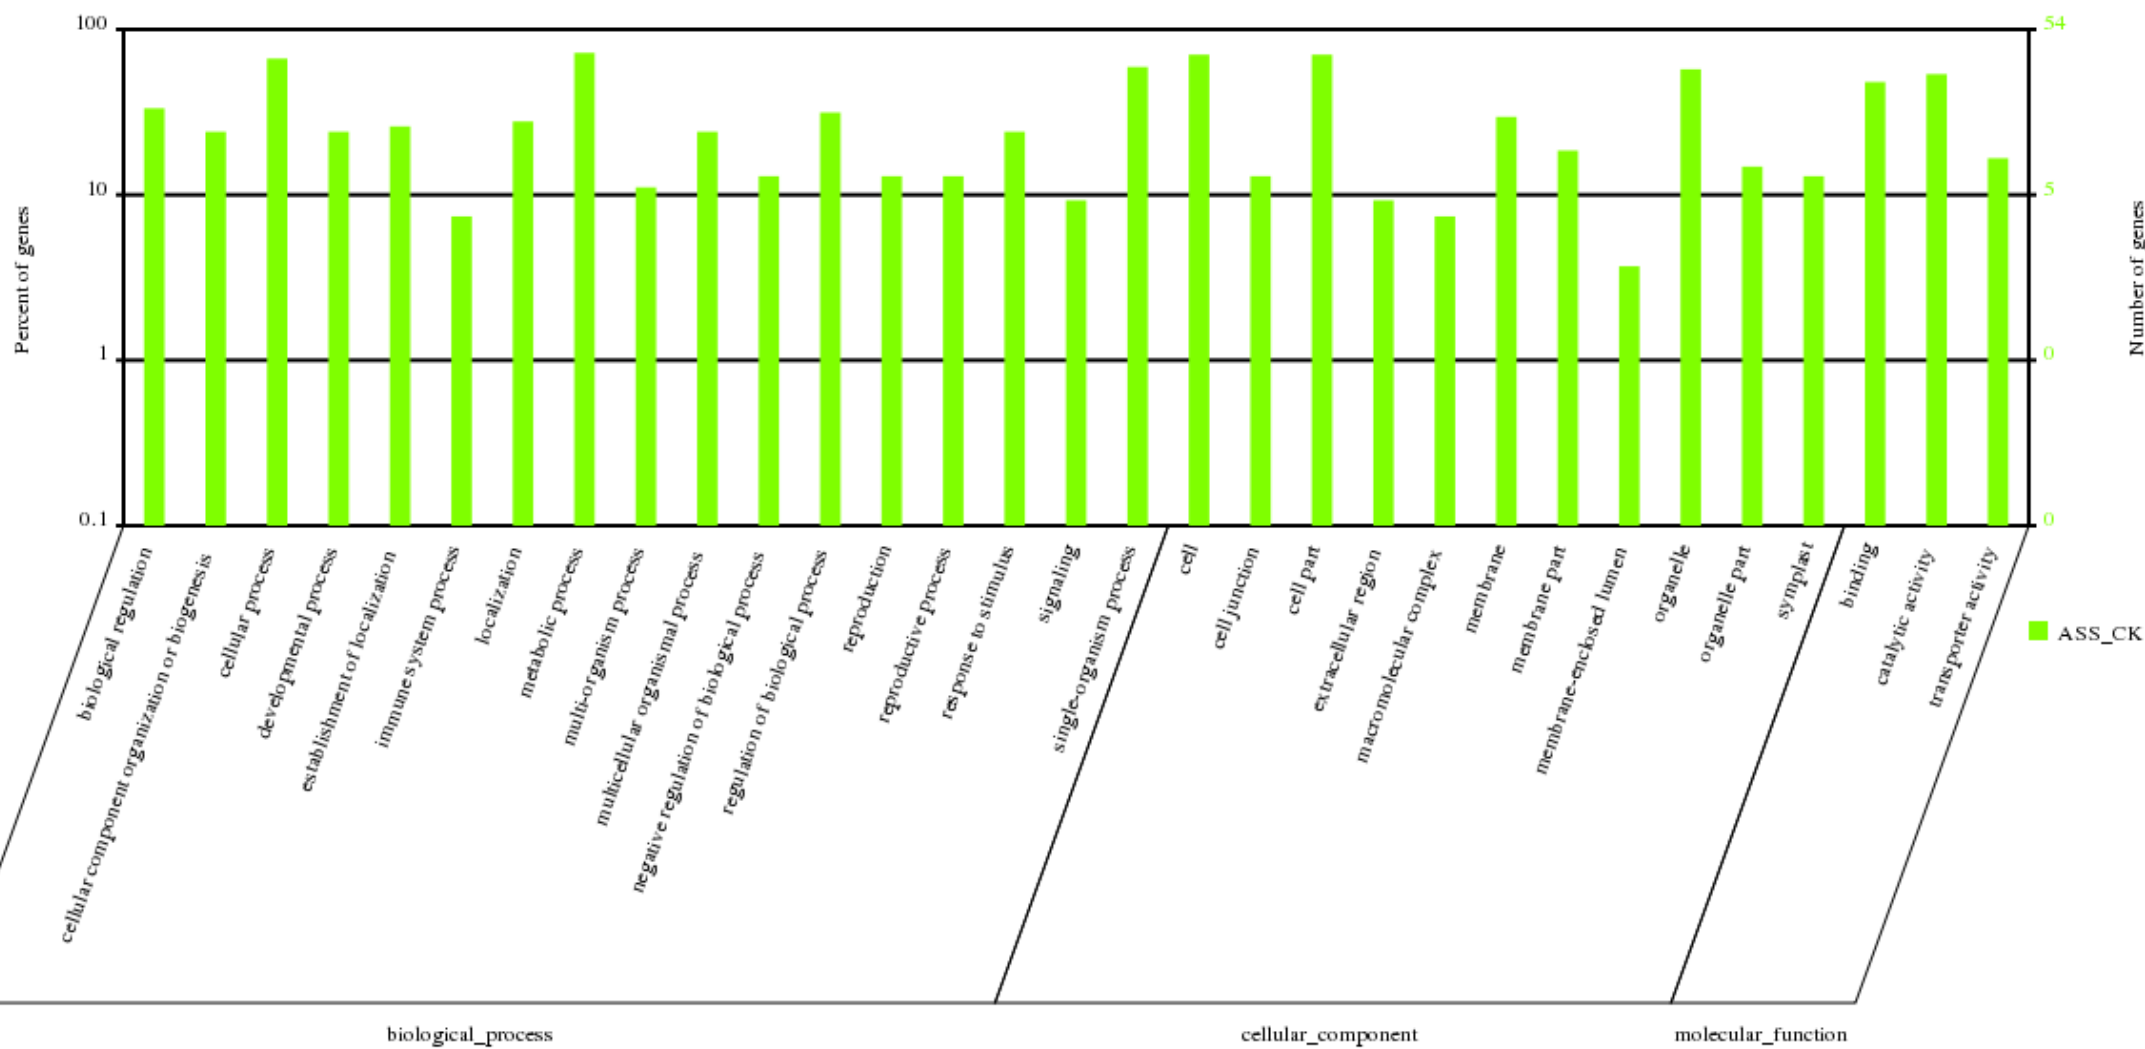

D

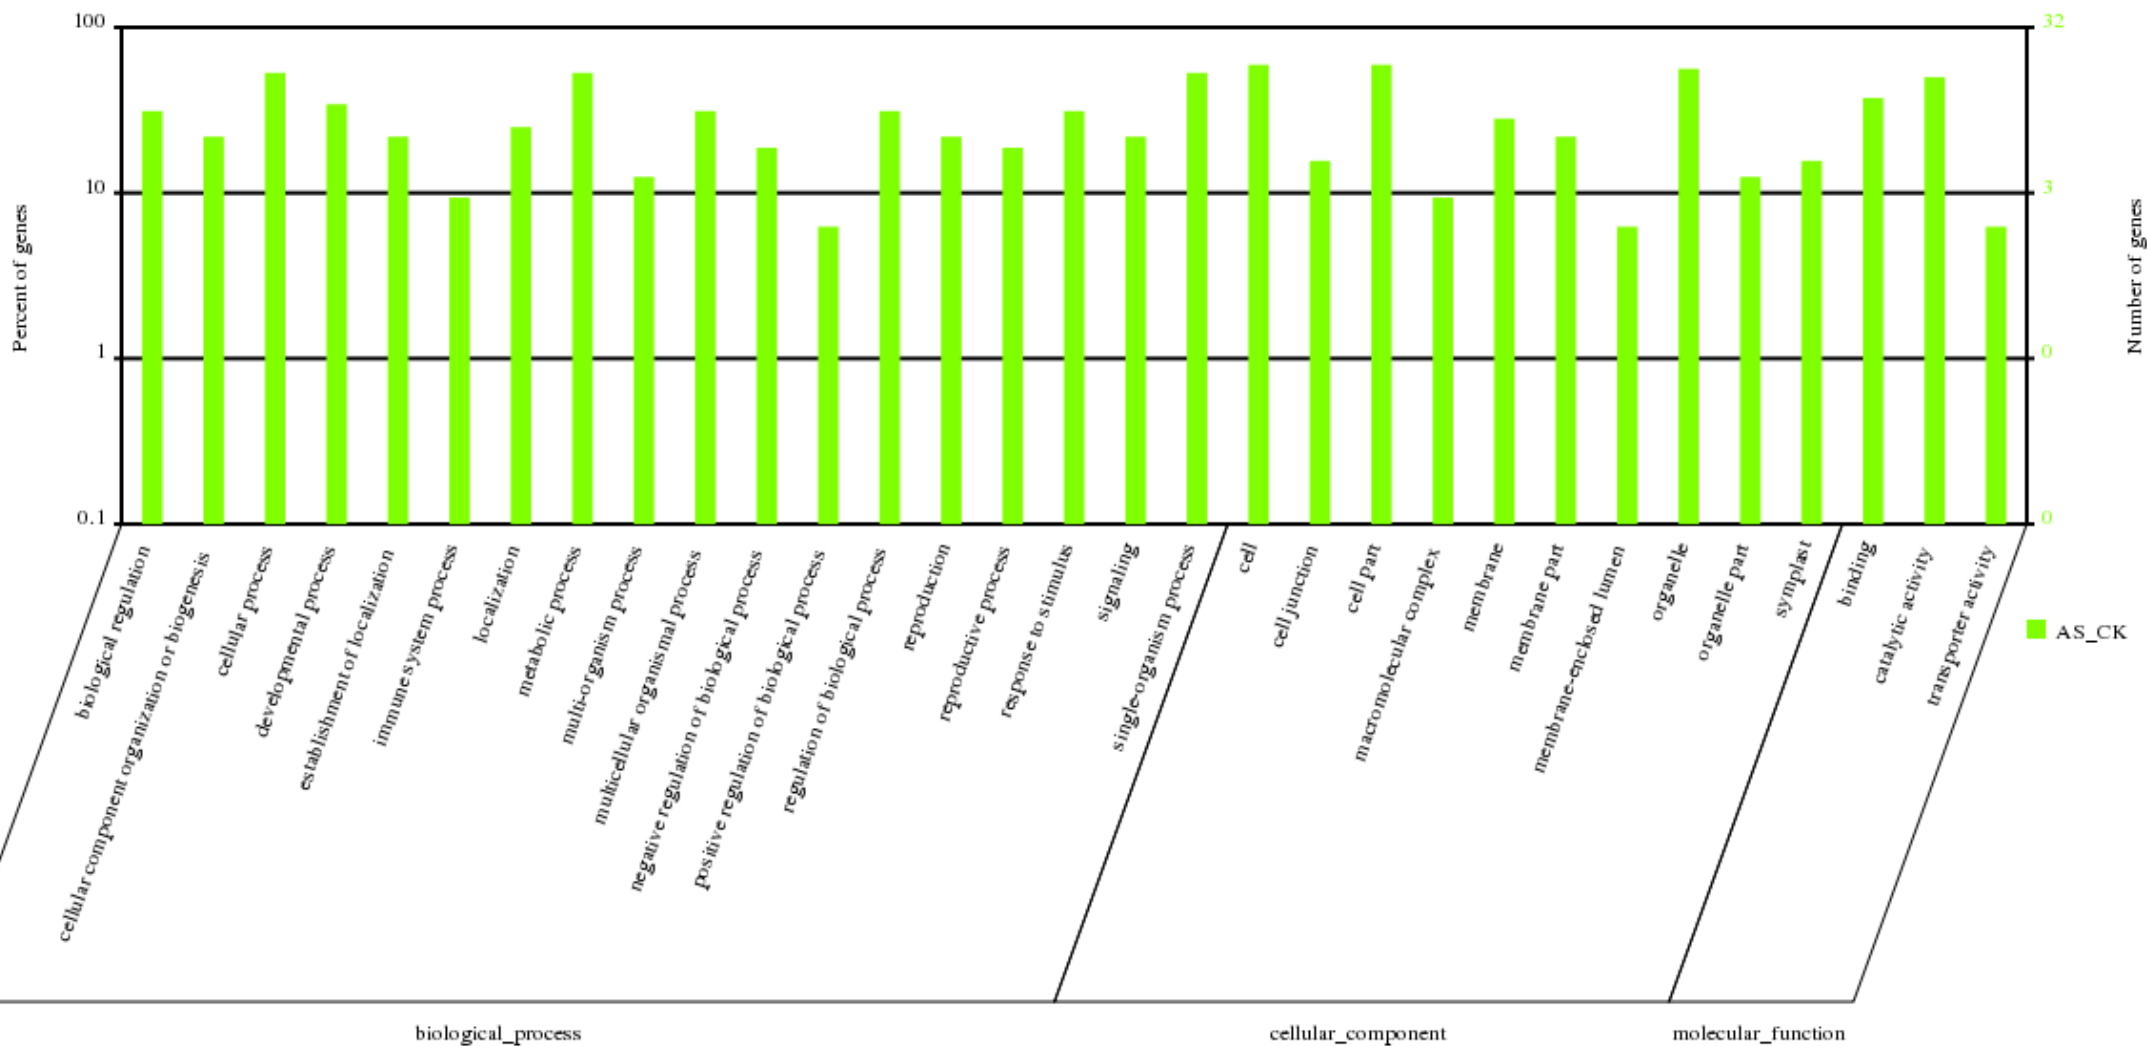

E

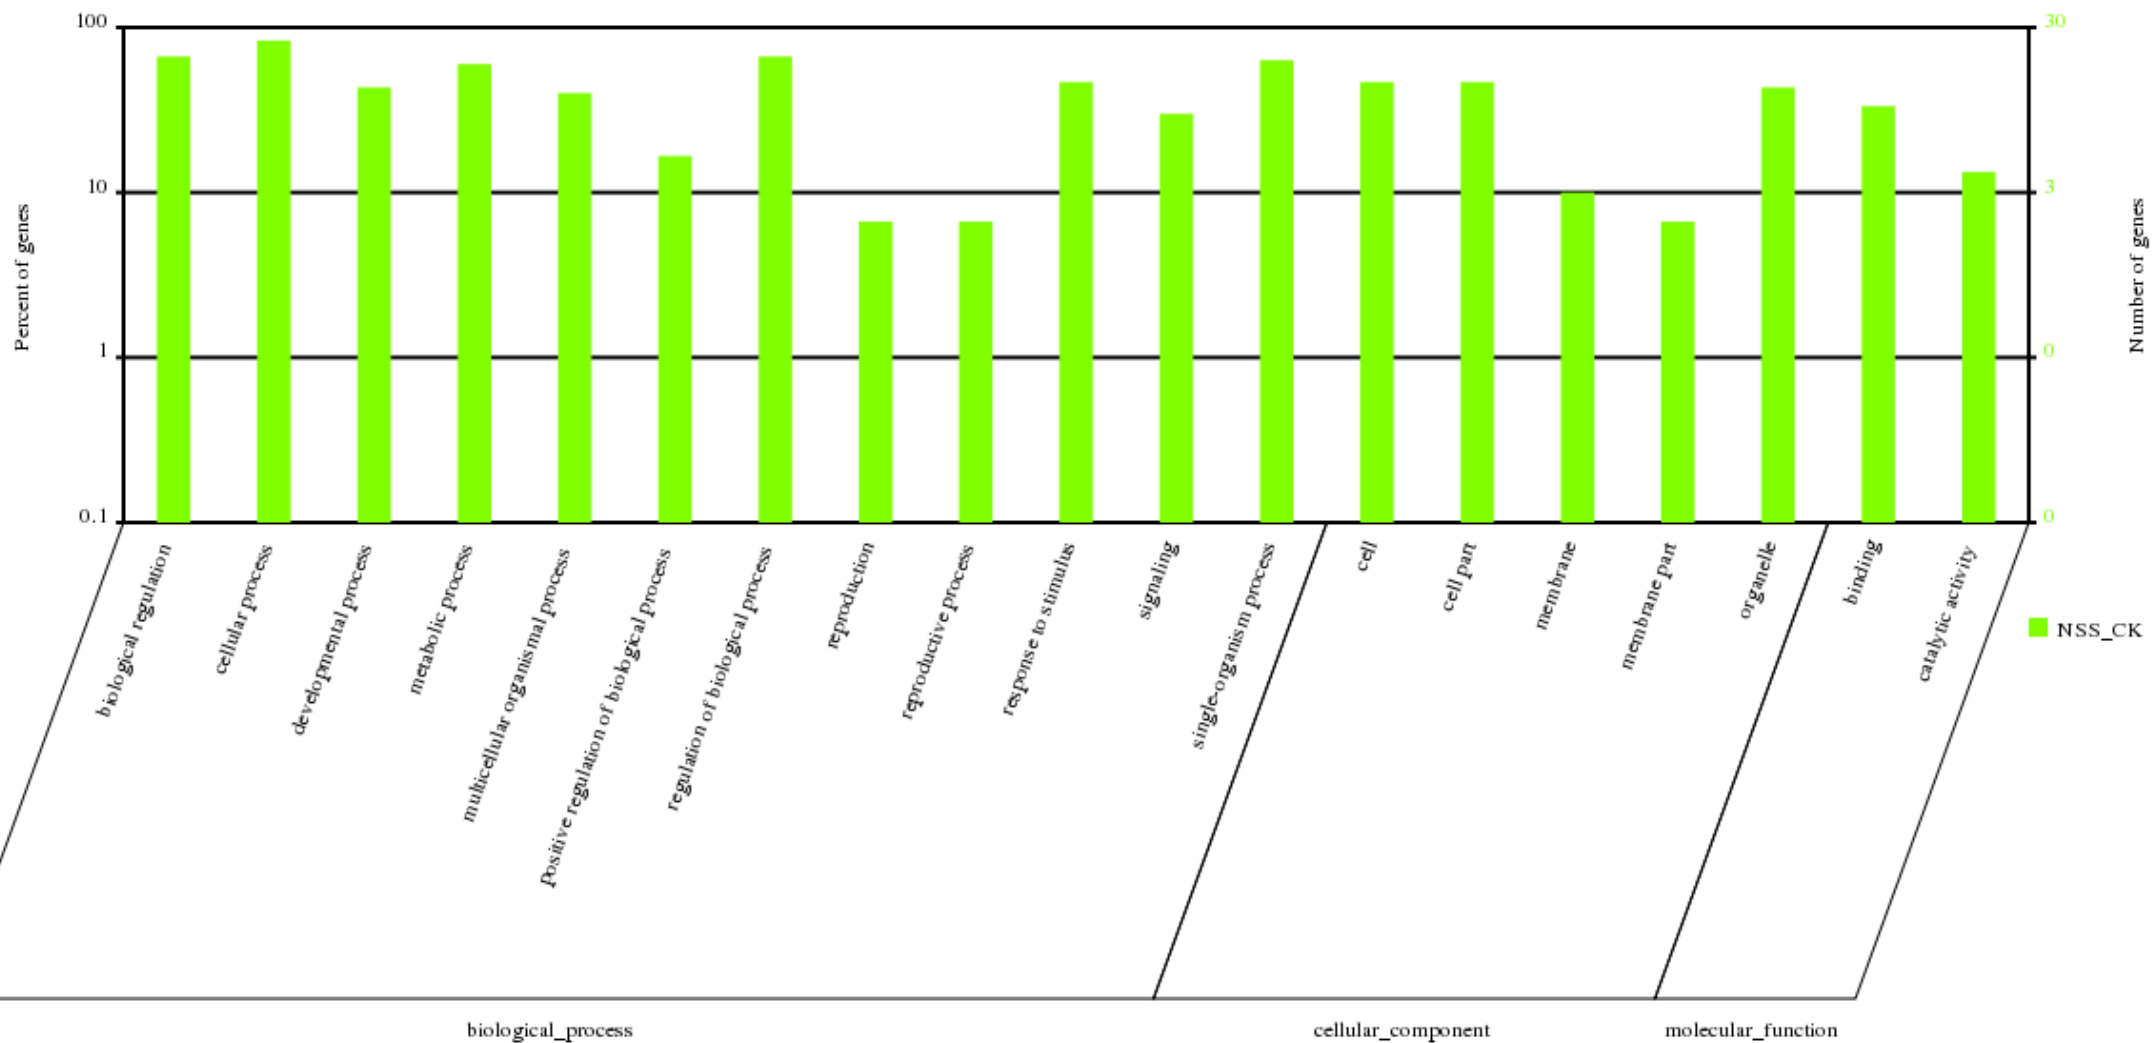

F

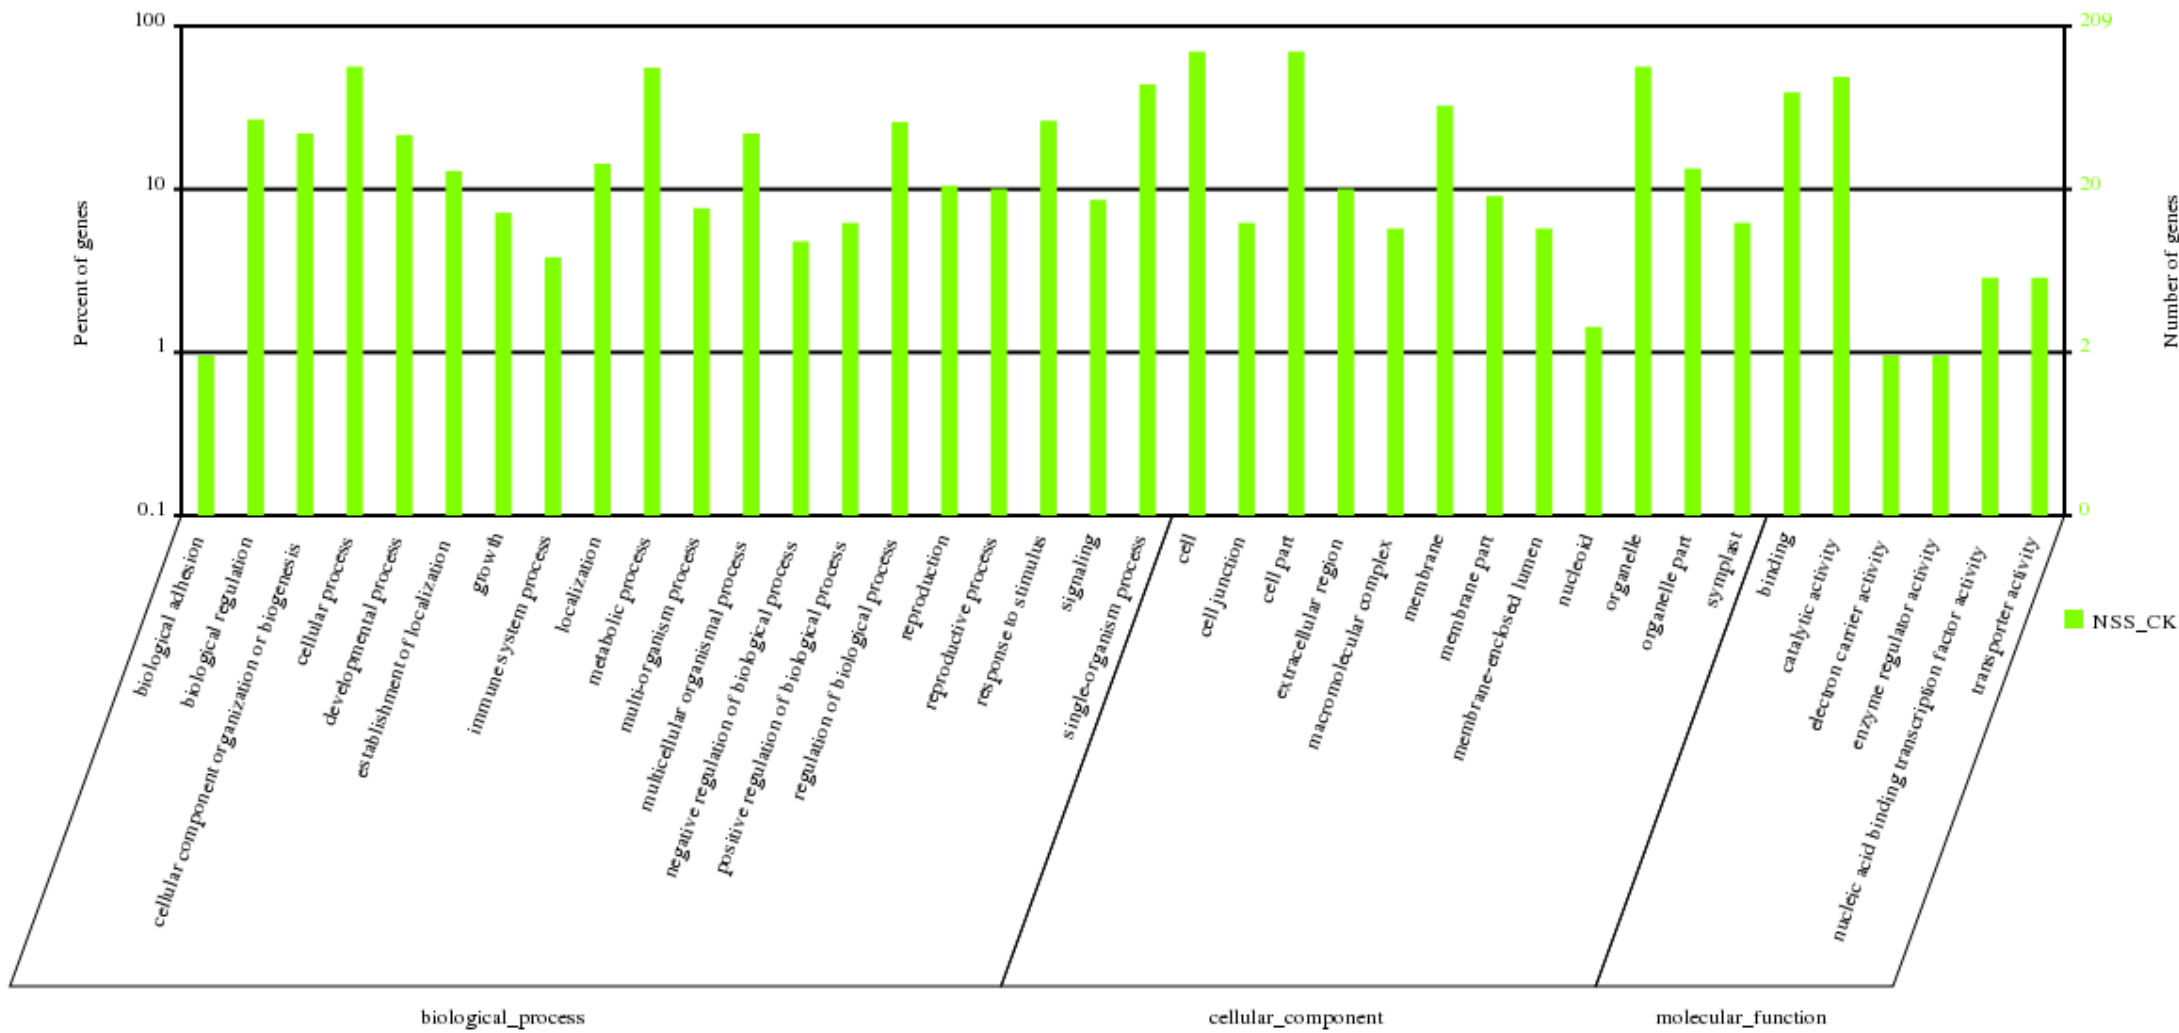

Additional file 7 GO ontology statistics of target genes of differential expressed known miRNAs and novel miRNAs

In this ontology, 'cellular location,' 'biological process' and 'molecular function' are treated as independent attributes. A-C. Known miRNA targets in AS\_CK, AS2\_CK, NSS\_CK, respectively; D-F. Novel miRNA targets in AS\_CK, AS2\_CK, NSS\_CK, respectively.
